# Supplementary material for: Pancreatic islets seeded in a novel bioscaffold forms an organoid to rescue insulin production and reverse hyperglycemia in models of type 1 diabetes
Source: PubMed Central journal article supplement (PMC7062832; doi:10.1038/s41598-020-60947-x), 2020-03-09
Supplement: 41598_2020_60947_MOESM1_ESM.pdf [file 41598_2020_60947_MOESM1_ESM.pdf]

**Pancreatic islets seeded in a novel bioscaffold forms an organoid to rescue insulin production and reverse hyperglycemia in models of type 1 diabetes**

Diana M. Elizondo<sup>1</sup>, Nailah Z. D. Brandy<sup>1</sup>, Ricardo L. L. da Silva<sup>1,2</sup>, Tatiana R. de Moura<sup>2</sup>, Jamel Ali<sup>3</sup>, Dazhi Yang<sup>1</sup> and Michael W. Lipscomb<sup>1</sup>

<sup>1</sup>Department of Biology, Howard University, Washington, DC, United States

<sup>2</sup>Laboratório de Imunologia e Biologia Molecular-Hospital Universitário, Universidade Federal de Sergipe, Aracaju, Brazil

<sup>3</sup>Department of Chemical and Biomedical Engineering, FAMU-FSU College of Engineering, Tallahassee, Florida, USA, 32310
